# Supplementary material for: Preparation and evaluation of polydopamine imprinting layer coated multi-walled carbon nanotubes for the determination of testosterone in prostate cancer LNcap cells
Source: Royal Society of Chemistry journal article supplement (doi:10.1039/c5ay01690h), 2015-01-01
Supplement: c5ay01690h1.pdf [file c5ay01690h1.pdf]

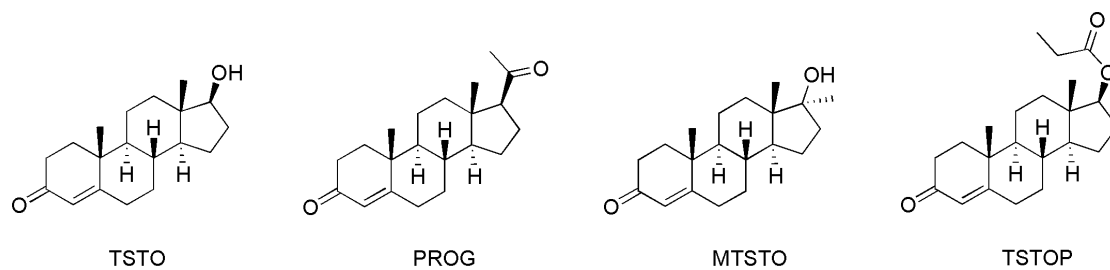

Fig.S1 Molecular structures of template and other analogues.

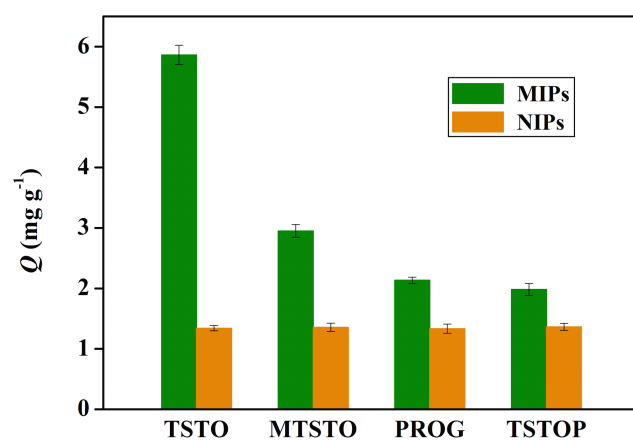

Fig.S2 The selective adsorption capacity of MCNTs@TSTO-MIPs and MCNTs@TSTO-NIPs to TSTO, PROG, MTSTO, and TSTOP in the mixture solution.

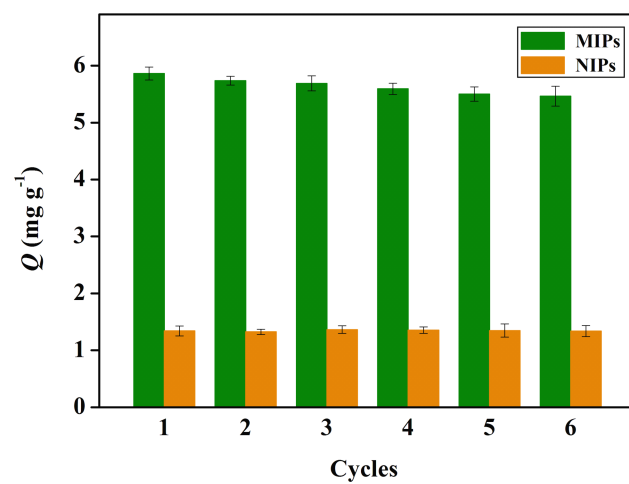

Fig.S3 The reusability of MCNTs@TSTO-MIPs and MCNTs@NIPs towards TSTO.

**Table S1**

Recoveries of MCNTs@TSTO-MIPs absorbing TSTO for spiked LNCaP cell samples. (n=5)

| LNCaP cell | TSTO                    |         |                         |         |                          |         |
|------------|-------------------------|---------|-------------------------|---------|--------------------------|---------|
|            | 1.0 ng mL <sup>-1</sup> |         | 5.0 ng mL <sup>-1</sup> |         | 50.0 ng mL <sup>-1</sup> |         |
|            | Recovery (%)            | RSD (%) | Recovery (%)            | RSD (%) | Recovery (%)             | RSD (%) |
| Intra-day  | 102.1                   | 4.7     | 99.8                    | 3.9     | 98.7                     | 2.3     |
| Inter-day  | 103.2                   | 5.1     | 100.7                   | 4.8     | 99.3                     | 3.4     |

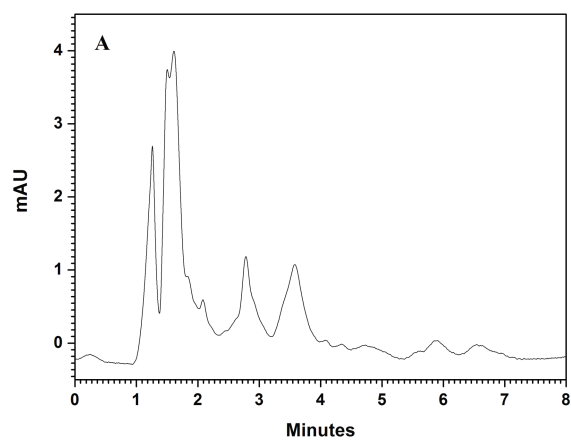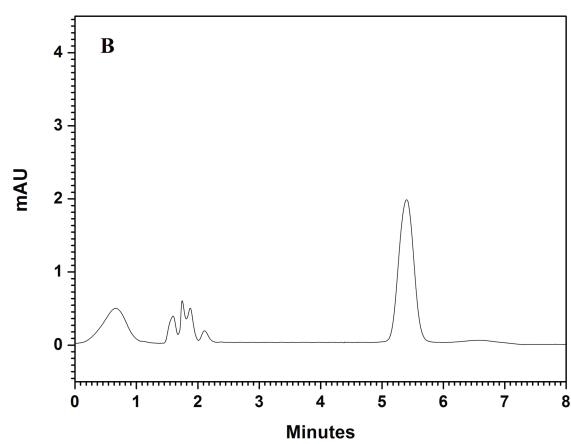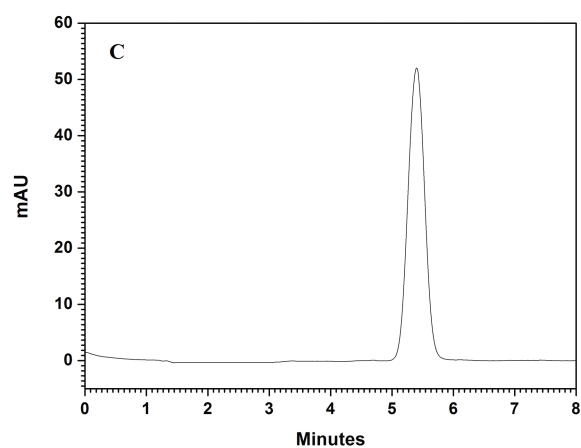

Fig. S4 Chromatograms of the human prostate cancer LNCaP cell spiked with TSTO at the concentration of 5.0 ng mL<sup>-1</sup> (A), elution of absorbed MCNTs@TSTO-MIPs (B), and TSTO standard sample (C).

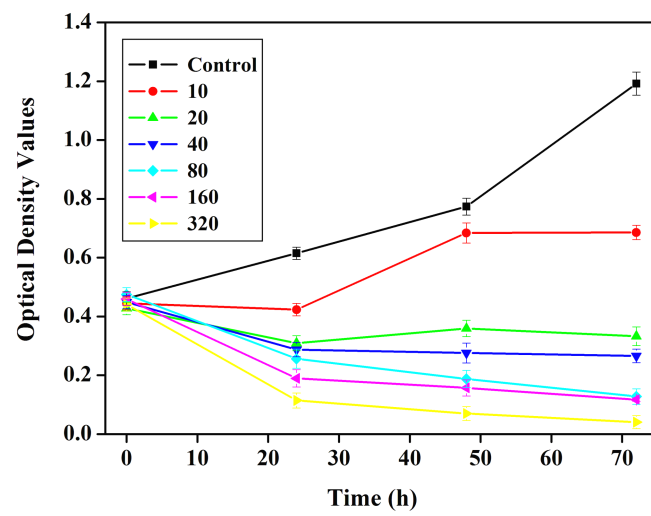

Fig. S5 The inhibitory effects of different amounts of MCNTs@TSTO-MIPs and different incubation times on the proliferation of LNCaP cells.

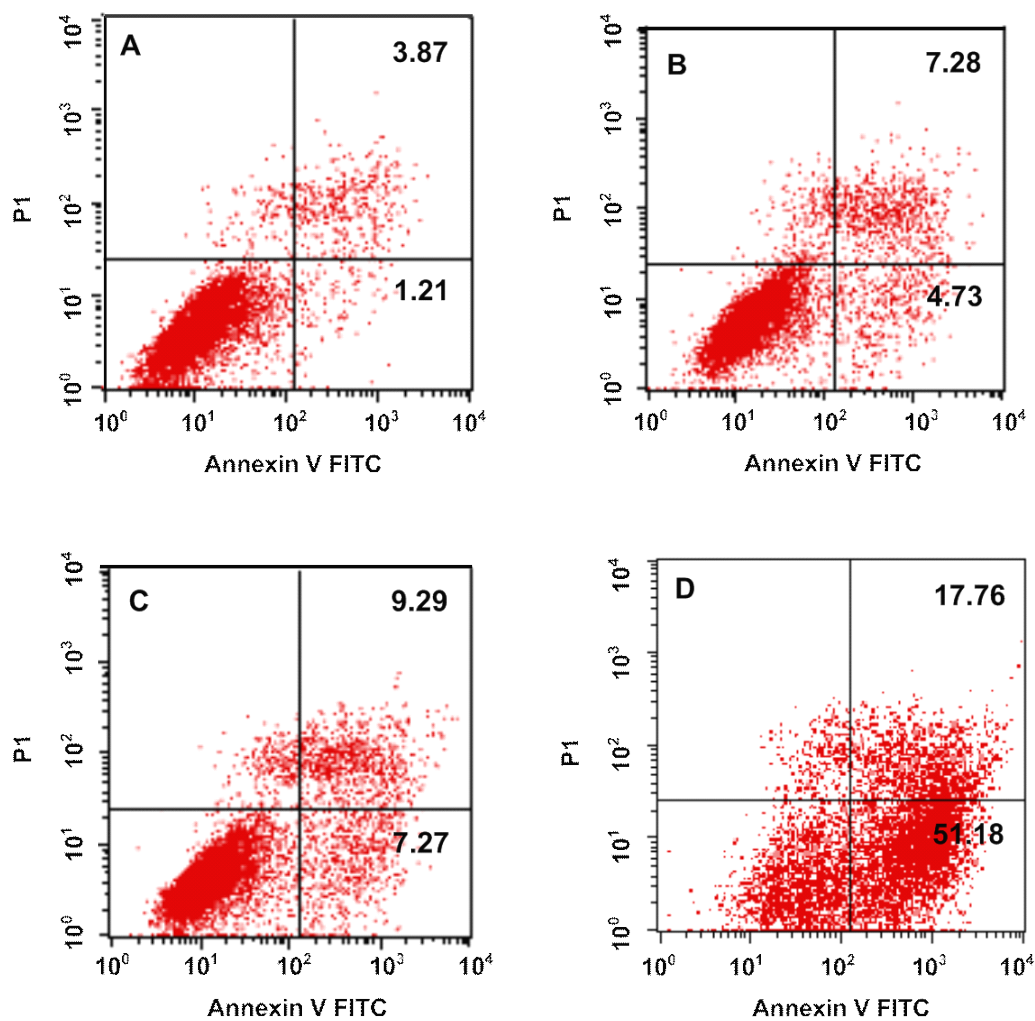

Fig. S6 The flow cytometry of control (A), 10 (B), 20 (C), and 40 (D)  $\mu\text{g mL}^{-1}$  of MCNTs@TSTO-MIPs for 48 h.
